# Supplementary material
Source: HighWire-hosted journal article supplement (https://bmjopen.bmj.com/content/10/9/e040996)
Supplement: inline-supplementary-material-3 [file inline-supplementary-material-3.pdf]

**Data extraction form**

|                                              |  |
|----------------------------------------------|--|
| <b>General information</b>                   |  |
| First author                                 |  |
| Year of publication                          |  |
| Corresponding author and email address       |  |
| <b>Study design</b>                          |  |
| Study setting                                |  |
| Sampling method                              |  |
| Randomization method                         |  |
| Allocation method                            |  |
| Blinding                                     |  |
| <b>Sample characteristics</b>                |  |
| Inclusion and exclusion criteria             |  |
| Sample size                                  |  |
| Characteristics of sample in the baseline    |  |
| <b>Tool used to measure fatigue</b>          |  |
| <b>Intervention</b>                          |  |
| Description of intervention                  |  |
| Number of participants in intervention group |  |
| Primary outcome: fatigue                     |  |
| Secondary outcome                            |  |
| Notes                                        |  |
| <b>Control</b>                               |  |
| Description of control                       |  |
| Number of participants in intervention group |  |
| Primary outcome: fatigue                     |  |
| Secondary outcome                            |  |
| Notes                                        |  |
| <b>Risk of bias</b>                          |  |
|                                              |  |
